# Supplementary material for: Non-Invasive Sampling in the Aspect of African Swine Fever Detection—A Risk to Accurate Diagnosis
Source: MDPI journal article supplement (doi:10.3390/v14081756), 2022-08-11
Supplement: s1 [file s1]

Table S1. Detection of ASFV DNA in different matrices during whole trial period – individual results.

| <b>Trial/Trial period</b>  | <b>Pig No</b> | <b>Oral</b> | <b>Rectal</b> | <b>Blood</b> |
|----------------------------|---------------|-------------|---------------|--------------|
| T#1<br>(Arm07)<br>0-8dpi   | #1            | POS         | POS           | POS          |
|                            | #2            | POS         | POS           | POS          |
|                            | #3            | POS*        | NEG           | POS*         |
|                            | #4            | POS         | POS           | POS          |
|                            | #5            | POS         | POS           | POS          |
|                            | #6            | POS         | POS*          | POS          |
| T#2<br>(Pol18)<br>0-21dpi  | #1            | POS         | POS           | POS          |
|                            | #2            | NEG         | POS           | POS          |
|                            | #3            | POS*        | POS*          | POS          |
|                            | #4            | NEG         | POS*          | POS          |
|                            | #5            | NEG         | POS*          | NEG          |
|                            | #6            | POS         | POS           | POS          |
|                            | #7            | POS         | POS           | POS          |
| T#3<br>(NH/P68)<br>0-28dpi | #1            | POS         | NEG           | NEG          |
|                            | #2            | POS         | POS*          | NEG          |
|                            | #3            | NEG         | POS           | POS*         |
|                            | #4            | POS*        | NEG           | POS          |
|                            | #5            | POS         | POS*          | POS          |
|                            | #6            | POS         | NEG           | POS*         |

\*single detection, POS- positive, NEG – negative

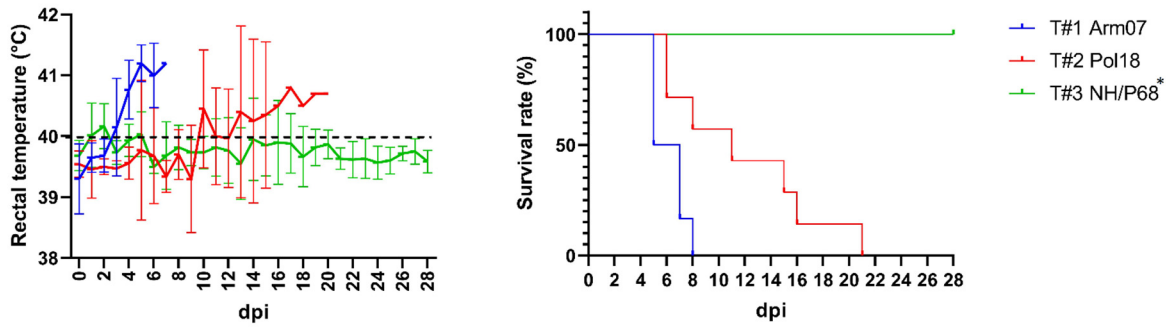

Figure S1. Rectal temperature and survival rate recorded during trials. Error bars indicate standard deviation. \*-euthanized at 28 dpi
